# Supplementary material for: The aspirin-induced long non-coding RNA OLA1P2 blocks phosphorylated STAT3 homodimer formation
Source: PubMed Central journal article supplement (PMC4762163; doi:10.1186/s13059-016-0892-5), 2016-02-22
Supplement: 13059_2016_892_MOESM2_ESM.pdf [file 13059_2016_892_MOESM2_ESM.pdf]

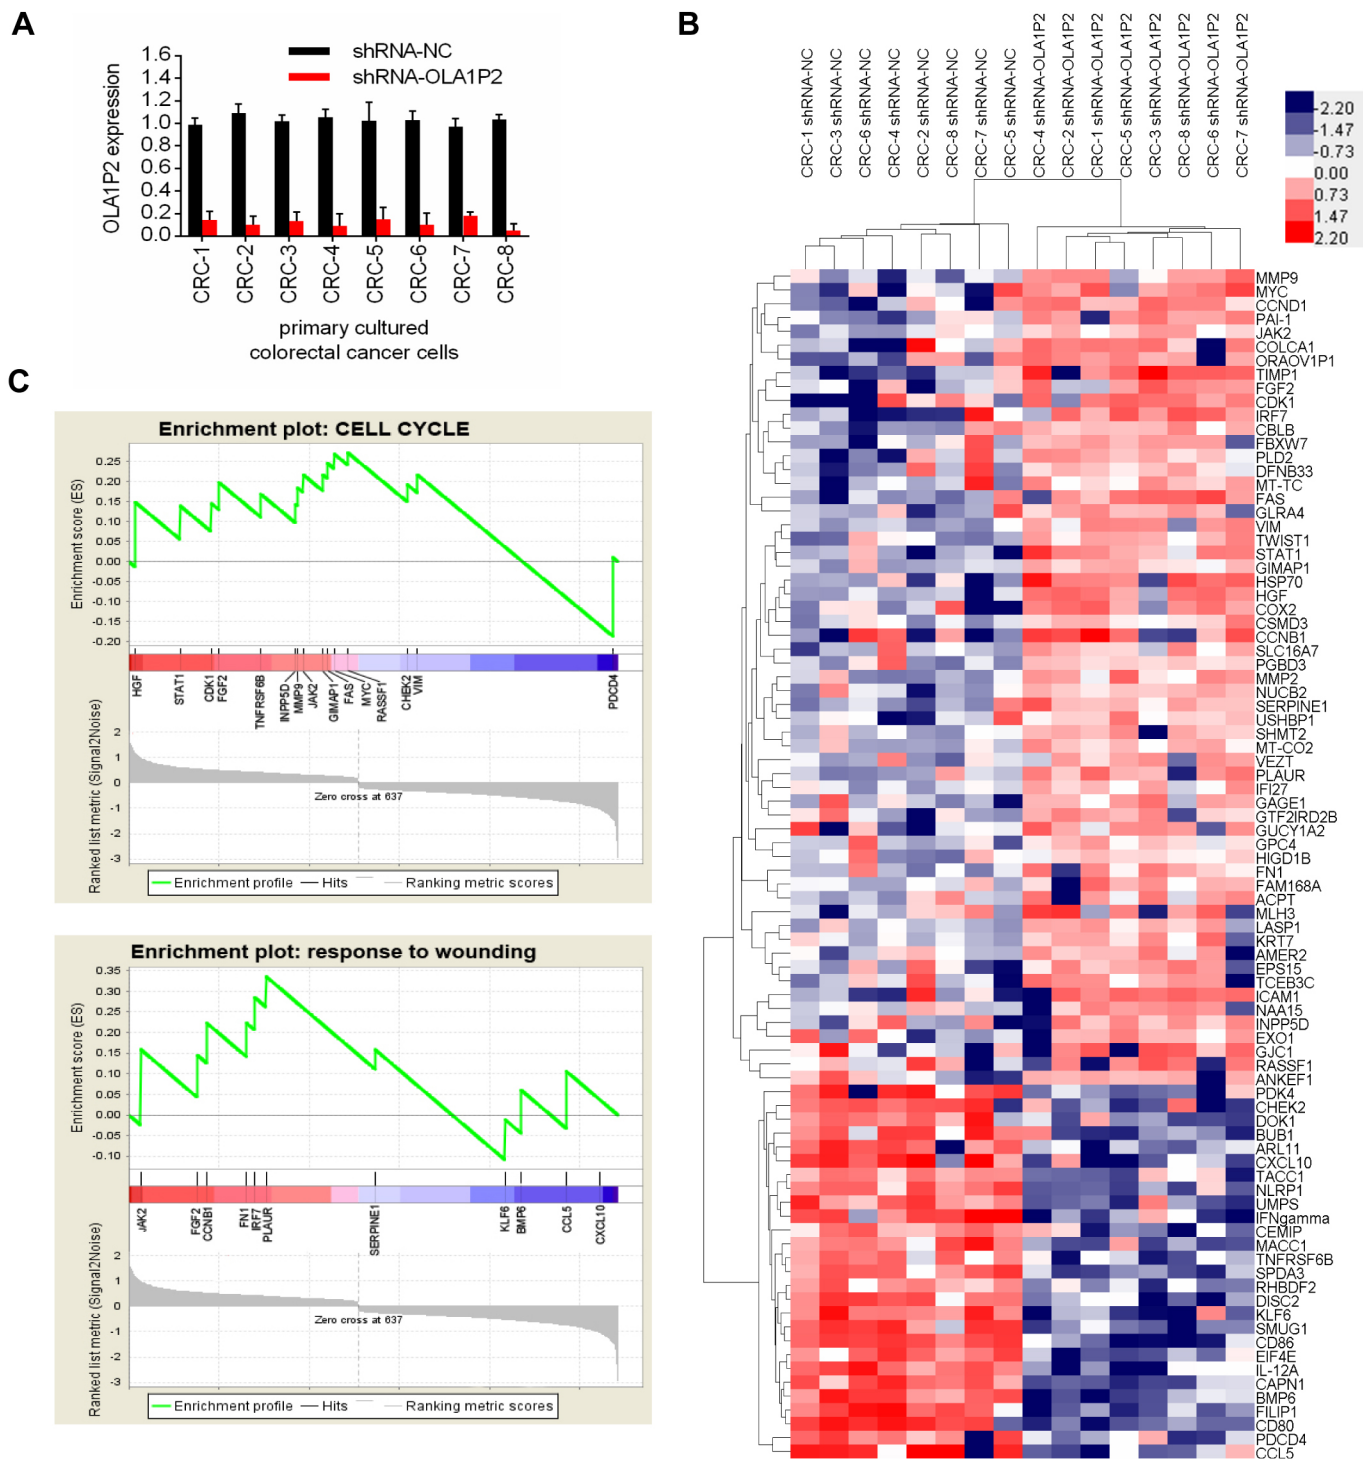

Supplementary Figure S1

**A**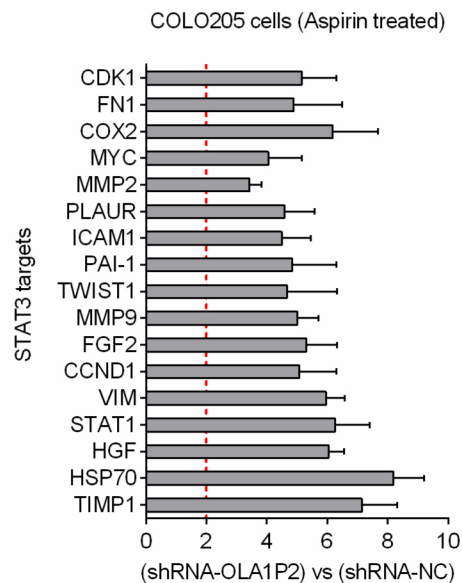**B**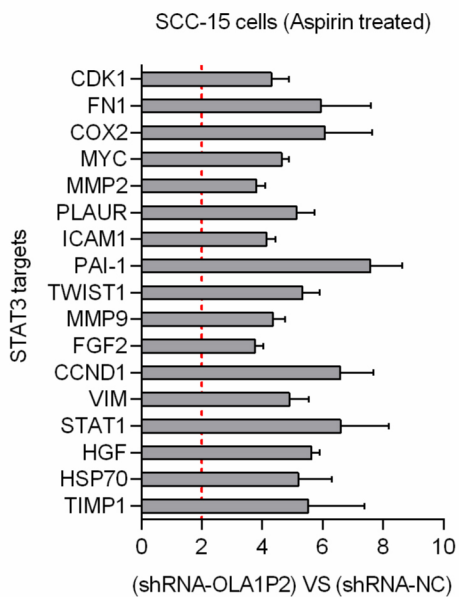**C**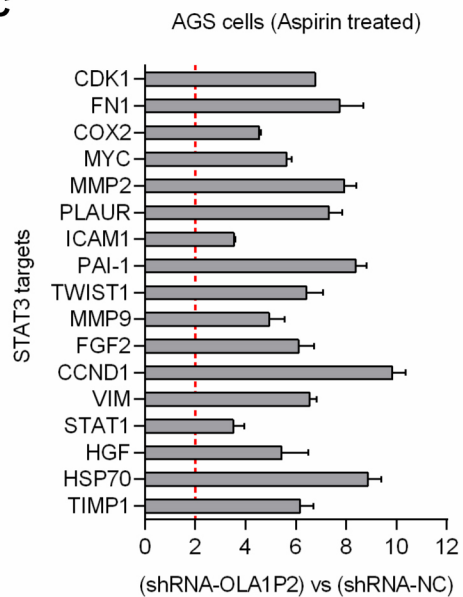

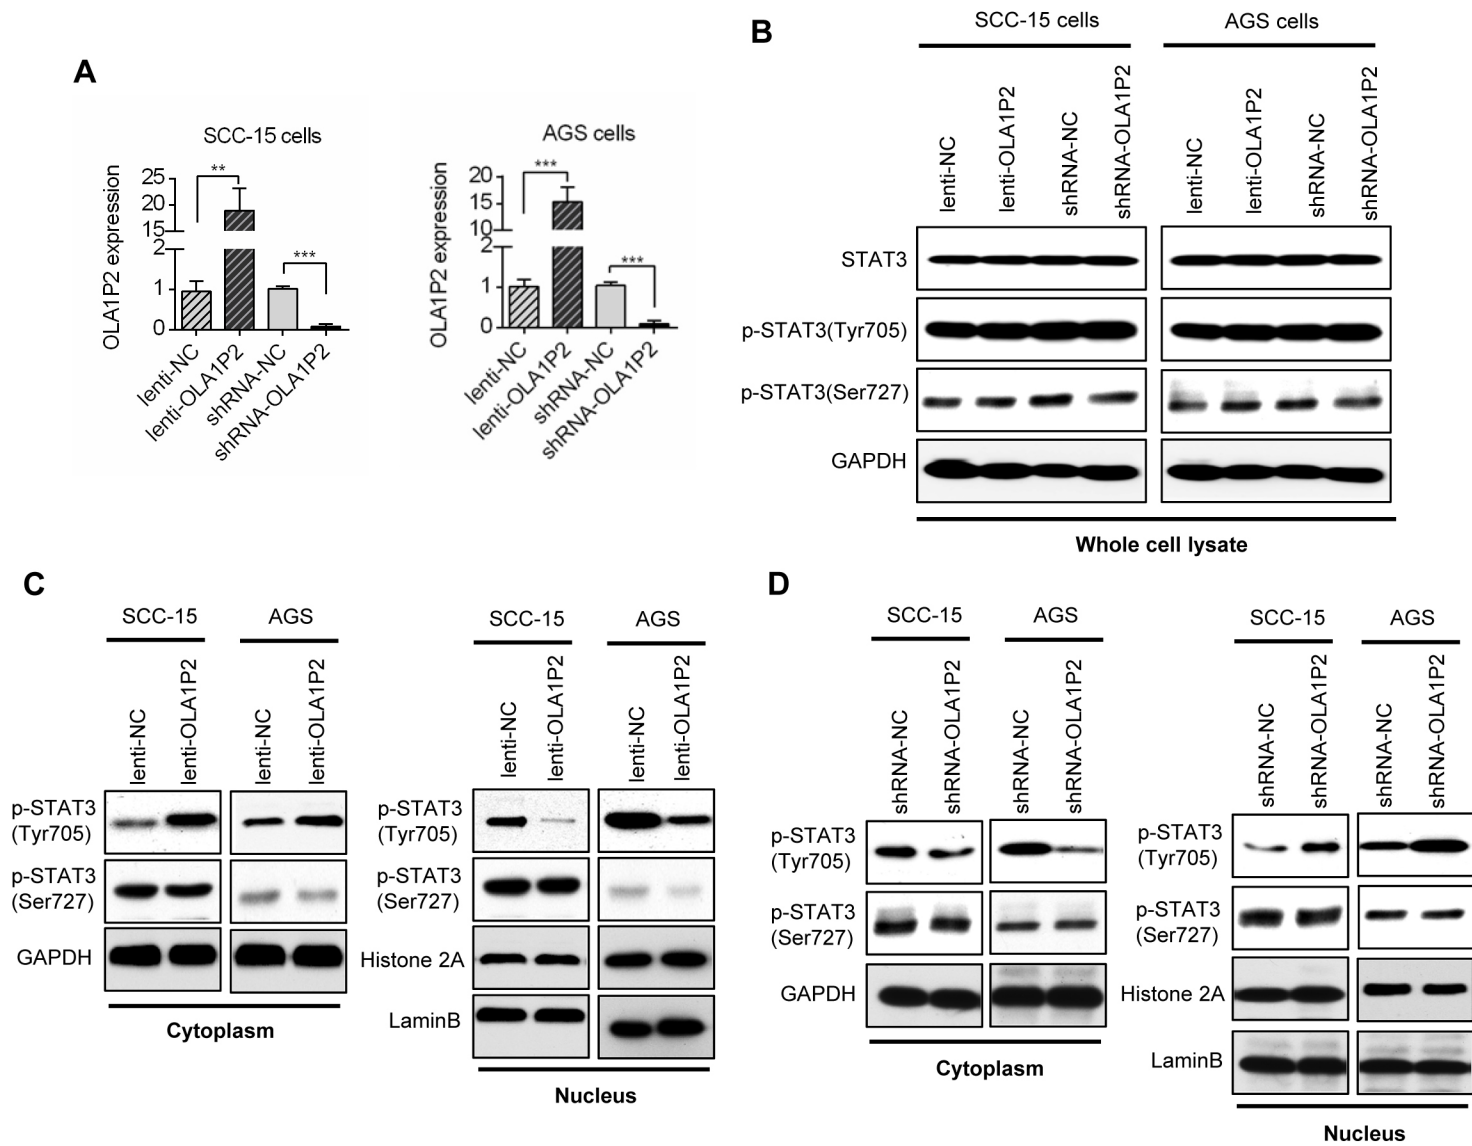

Supplementary Figure S3

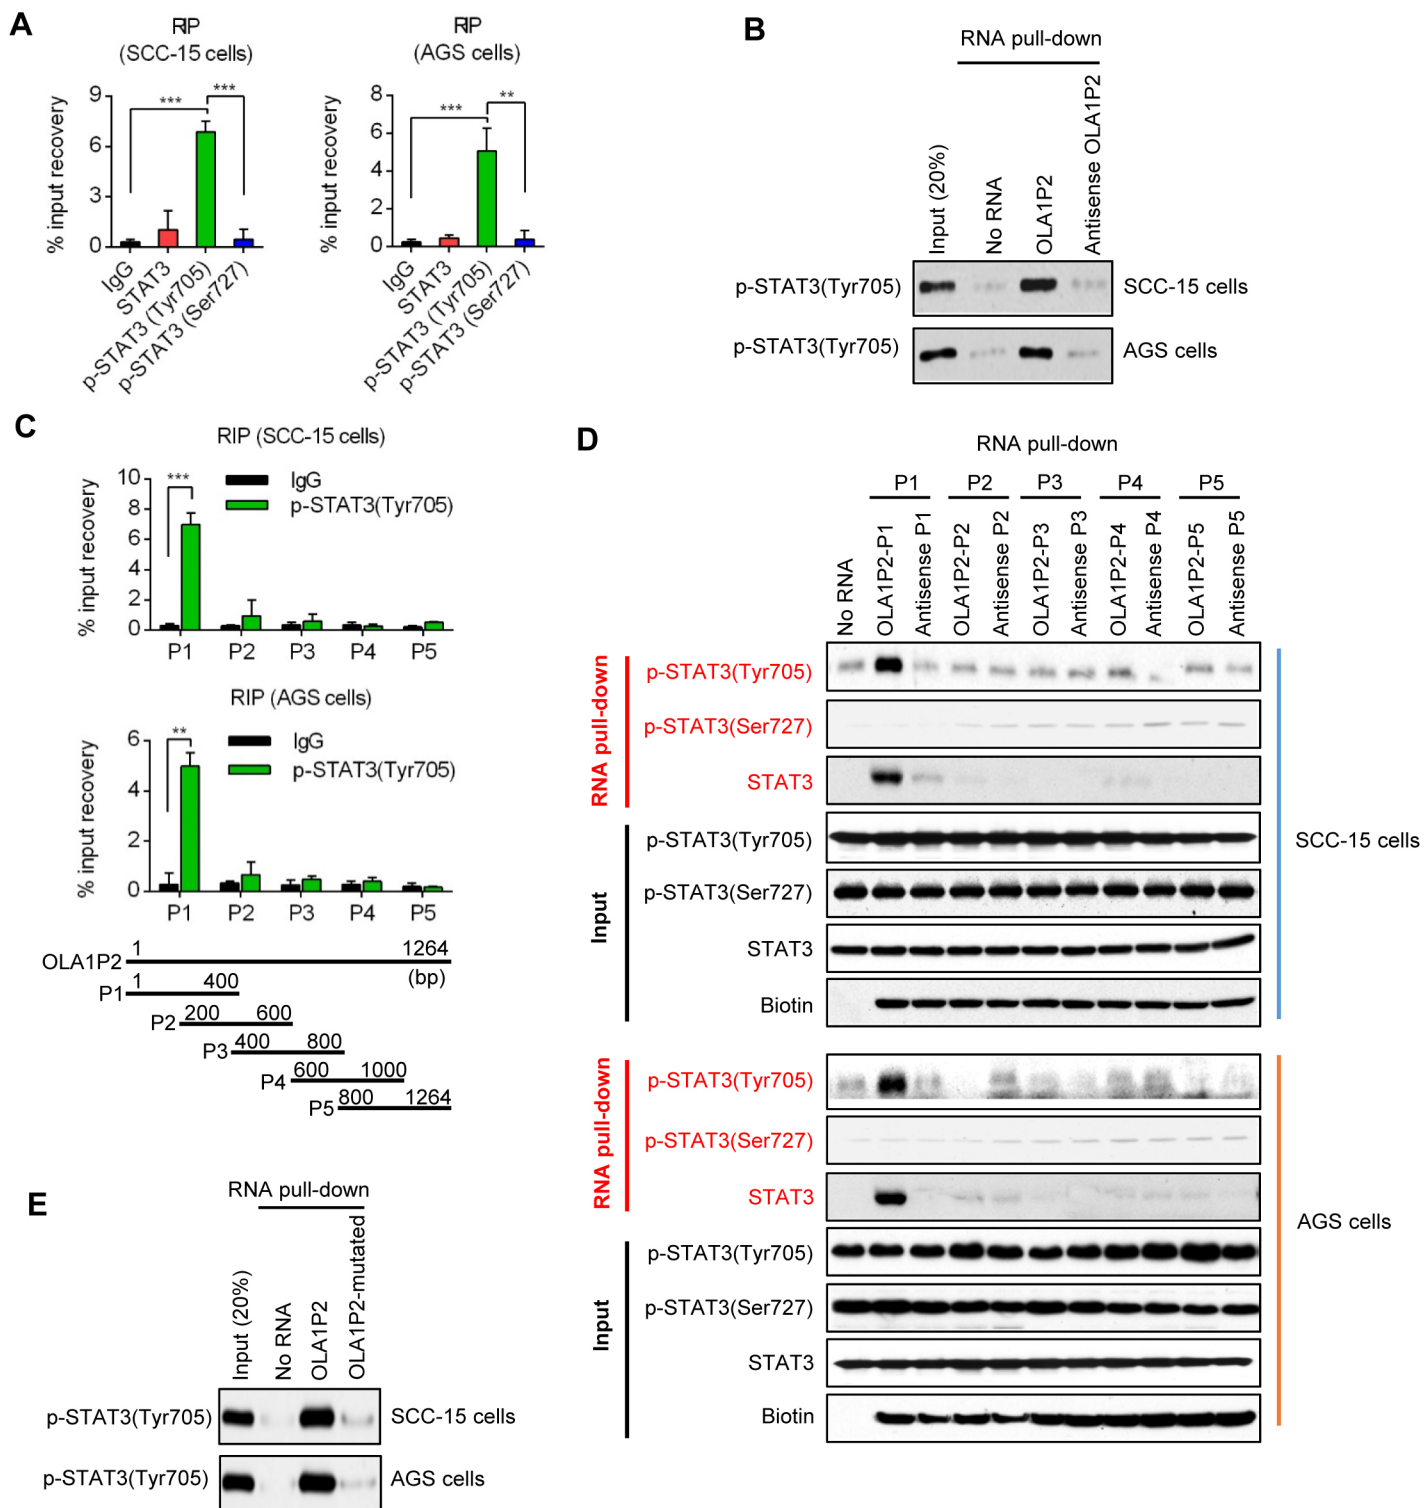

Supplementary Figure S4

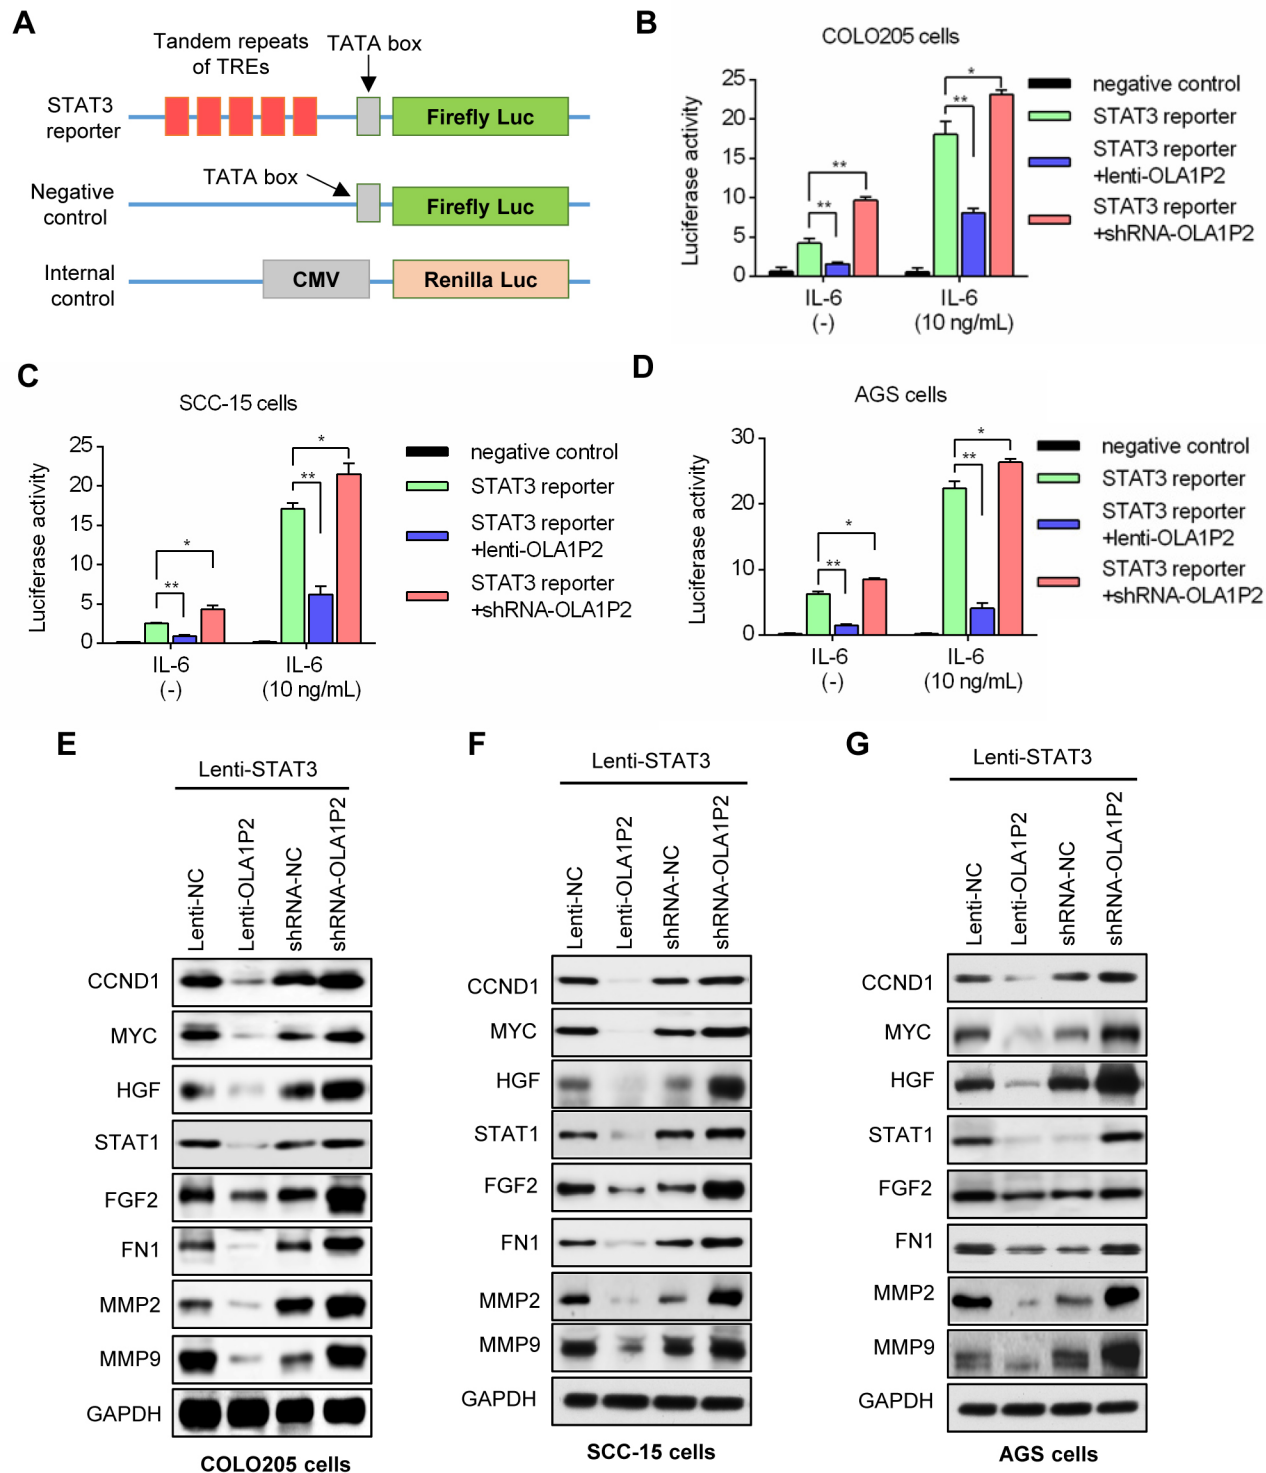

**A**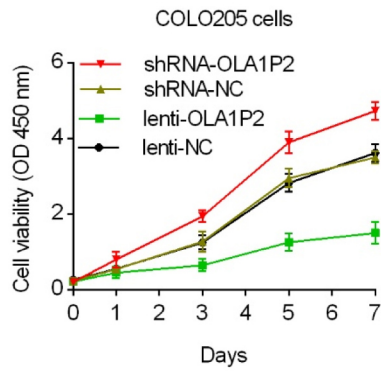**B**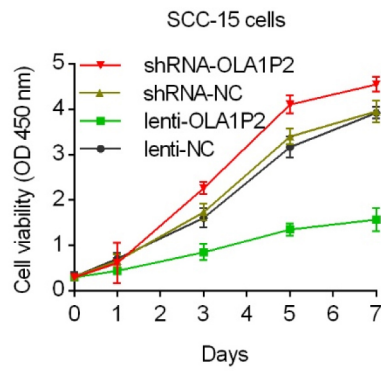**C**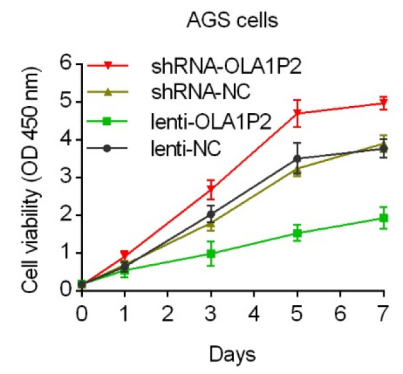**D**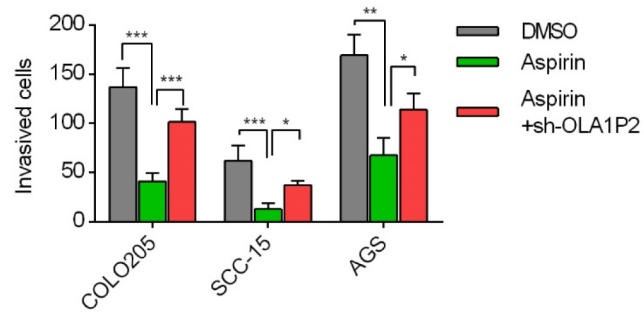

**A**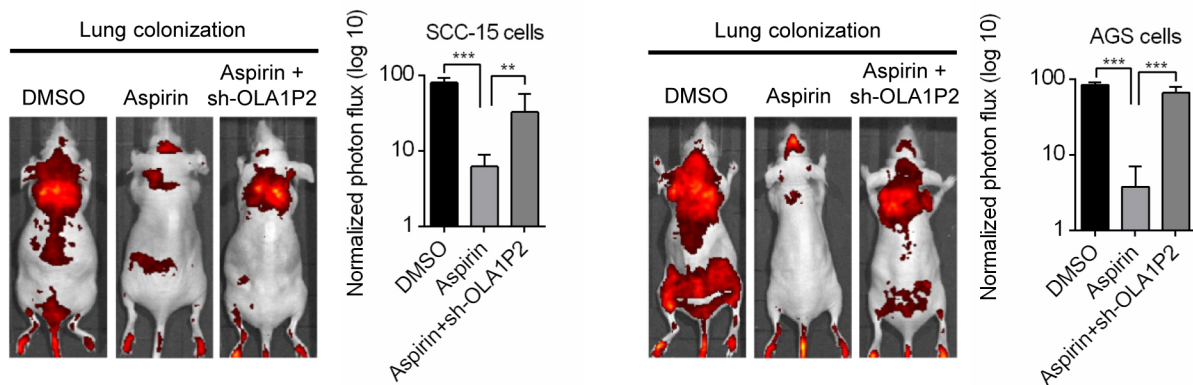**B**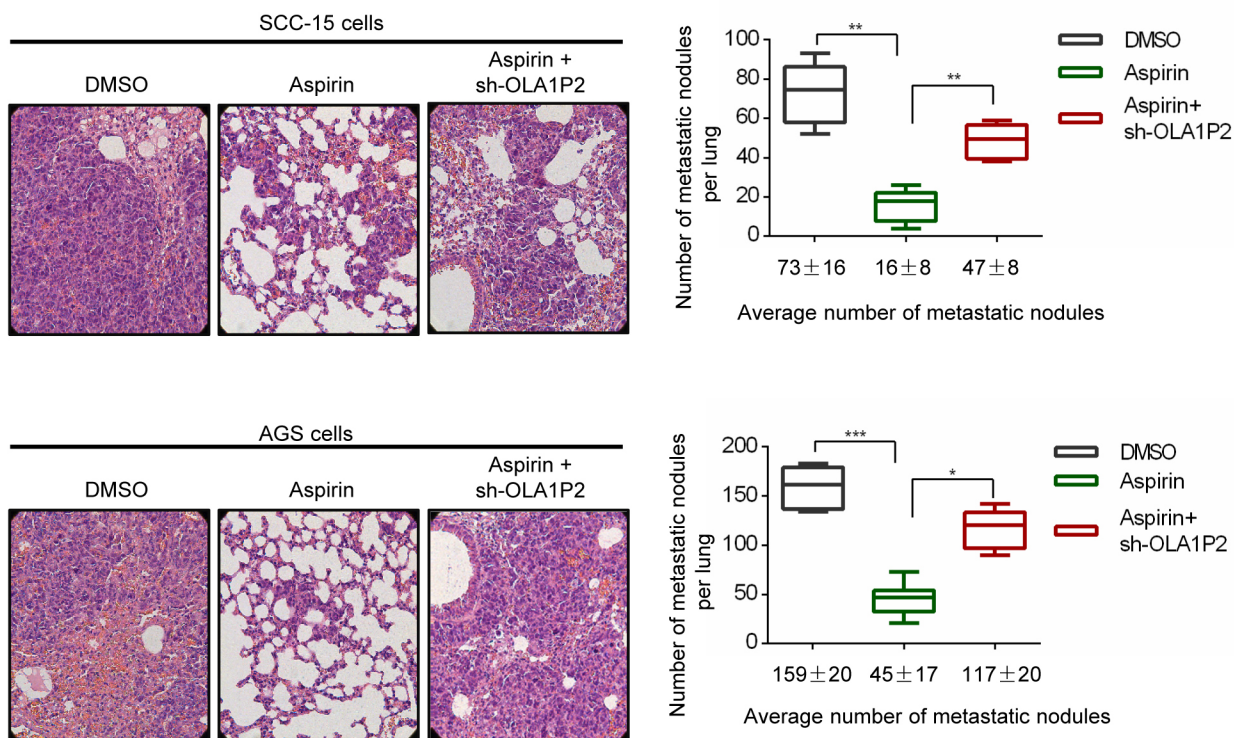

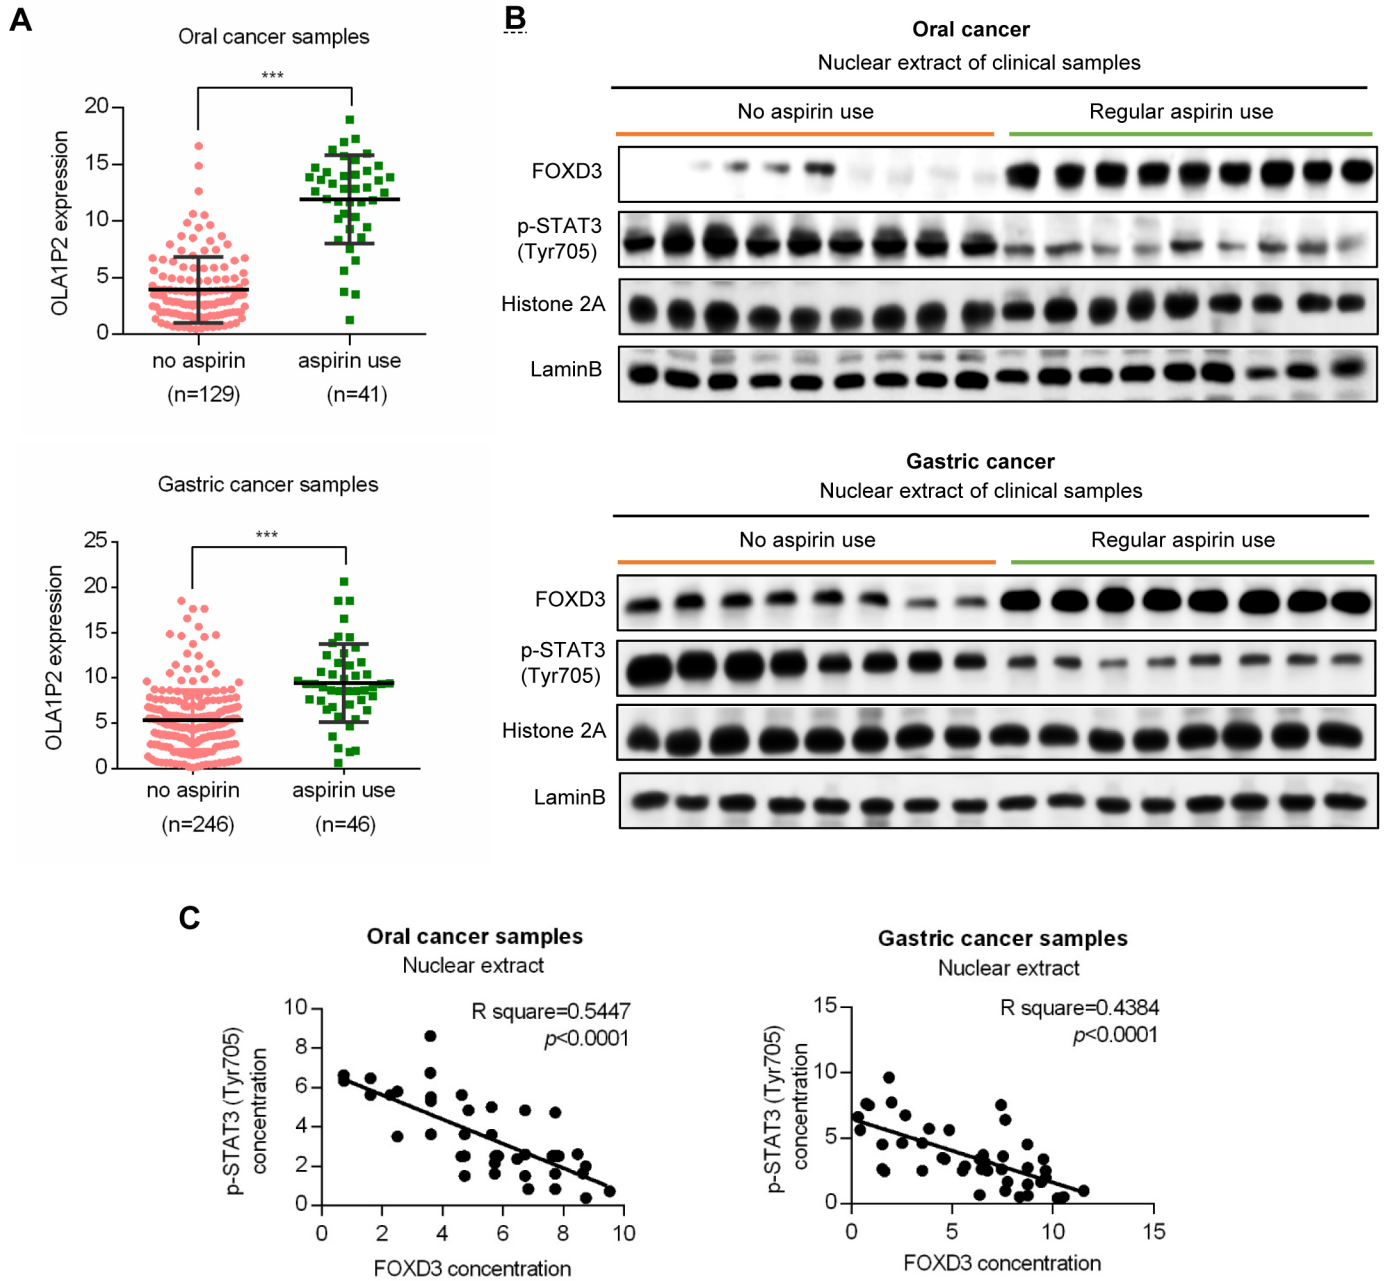

Supplementary Figure S8



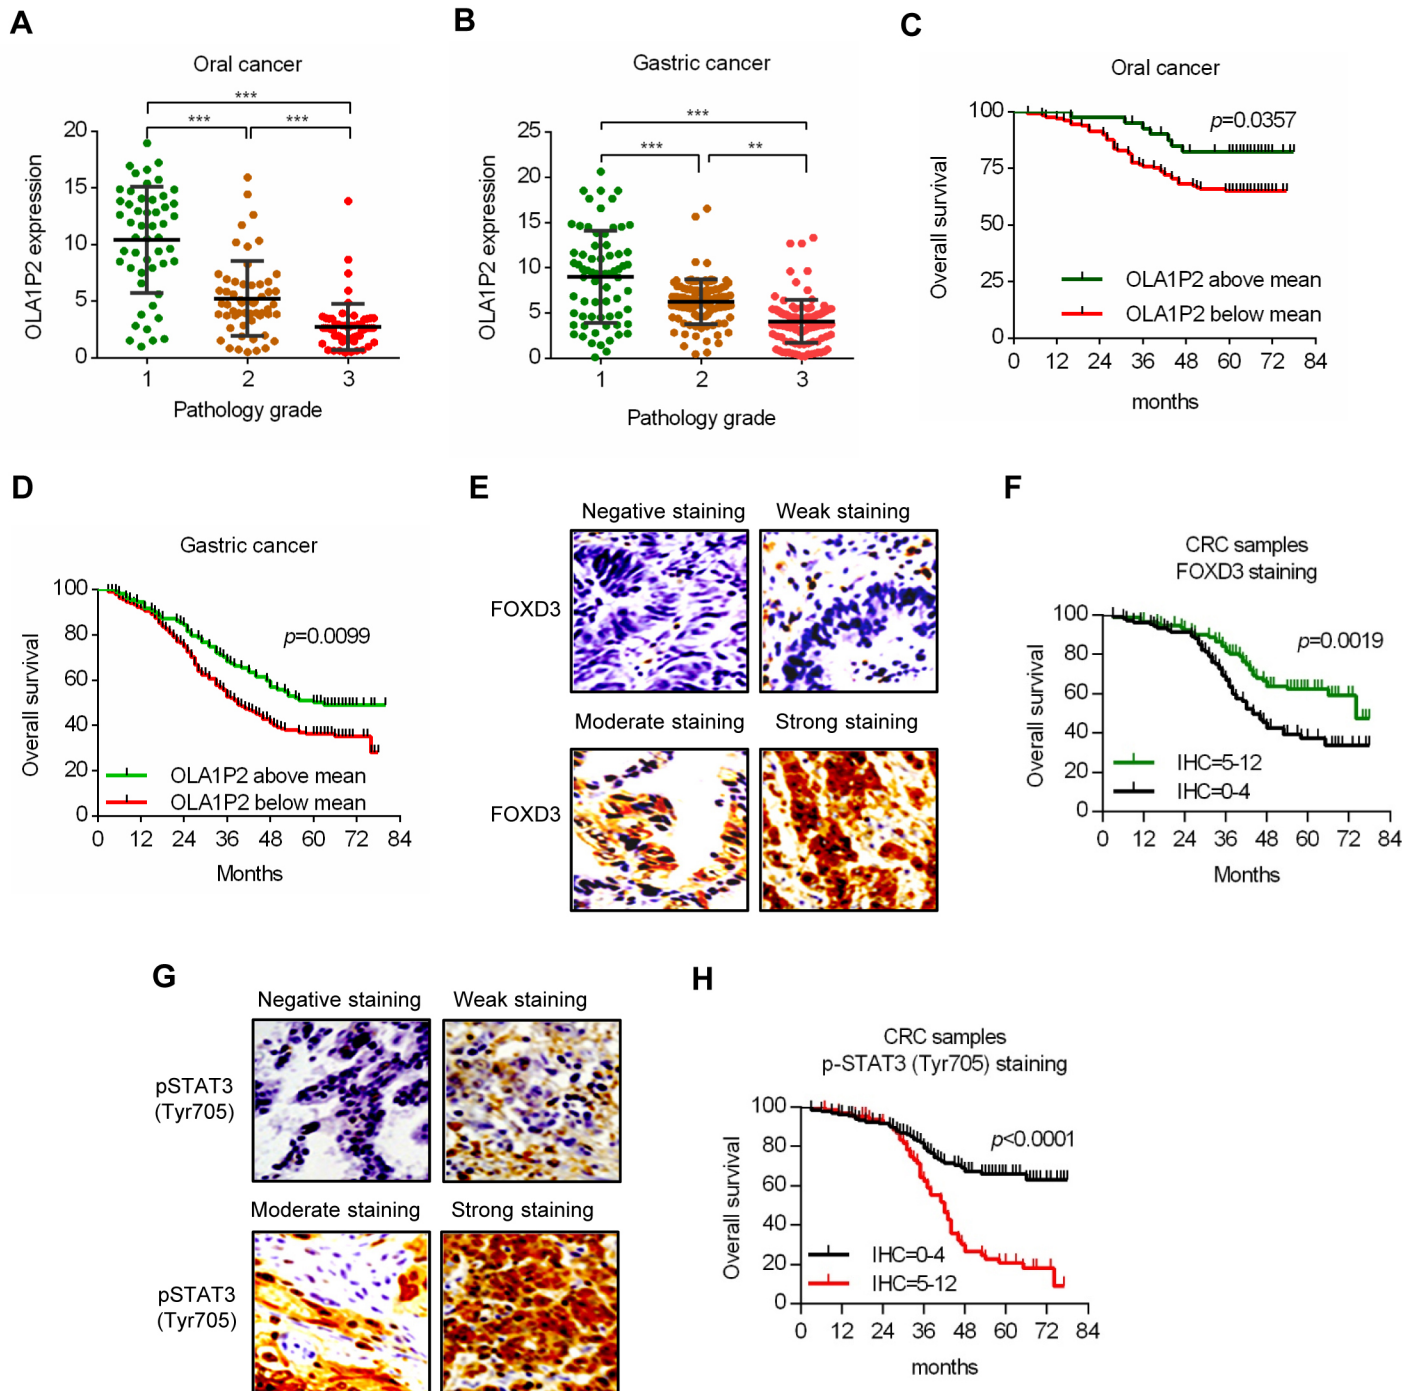

Supplementary Figure S9
